# Supplementary material for: Linking existing instruments to develop a continuum of care measure: accuracy comparison using function-related group classification
Source: Springer Nature journal article supplement (doi:10.1007/s11136-017-1598-1), 2017-05-24
Supplement: MOESM1 [file 12311586]

**Supplemental Figures**

Figure 1. Rehabilitation Impairment Classification (RIC) for Stroke: Function Related Groups (FRGs) Algorithm (Impairment code: 1.1 to 1.9)

Figure 2. Rehabilitation Impairment Classification (RIC) for Lower Extremity Amputation: Function Related Groups (FRGs) Algorithm (Impairment code: 5.3 to 5.9)

1

2

3

4

5

6

Stroke

7

8

9

16-74

RIC: Stroke

5-17

13-37

Age

> 74

Cognitive

13-48

Motor

38-62

18-35

49-55

Motor

49-62

Motor

> 48

Motor

56-62

> 62

Cognitive

63-73

> 30

Motor

74-91

RIC: Lower Limb Amputation (LLA)

1

LLA

2

13-54

Motor

55-91

Figure 3. Rehabilitation Impairment Classification (RIC) for Knee Replacement: Function Related Groups (FRGs) Algorithm (Impairment code: 8.6 to 8.62)

RIC: Status Post Knee Replacement (SPKR)

Cognitive

1

SPKR

3

4

2

5

6

7

13-17

Motor

18-46

16-80

> 17

Motor

47-56

Age

> 80

> 46

Motor

5-32

57-91

Cognitive

> 32

Motor

57-64

65-91

Figure 4. Rehabilitation Impairment Classification (RIC) for Hip Replacement: Function Related Groups (FRGs) Algorithm (Impairment code: 8.5 to 8.52)

RIC: Status Post Hip Replacement (SPHR)

Cognitive

1

SPHR

3

4

2

5

6

7

13-17

Motor

18-46

16-80

> 17

Motor

47-56

Age

> 80

> 46

Motor

5-32

57-91

Cognitive

> 32

Motor

57-64

65-91

Figure 5. Point Difference between Actual and Converted FIM Score Distribution of Five Test Forms (MDS_13, FIM_8, MDS_8, FIM_4, MDS_4)

(a) (b)


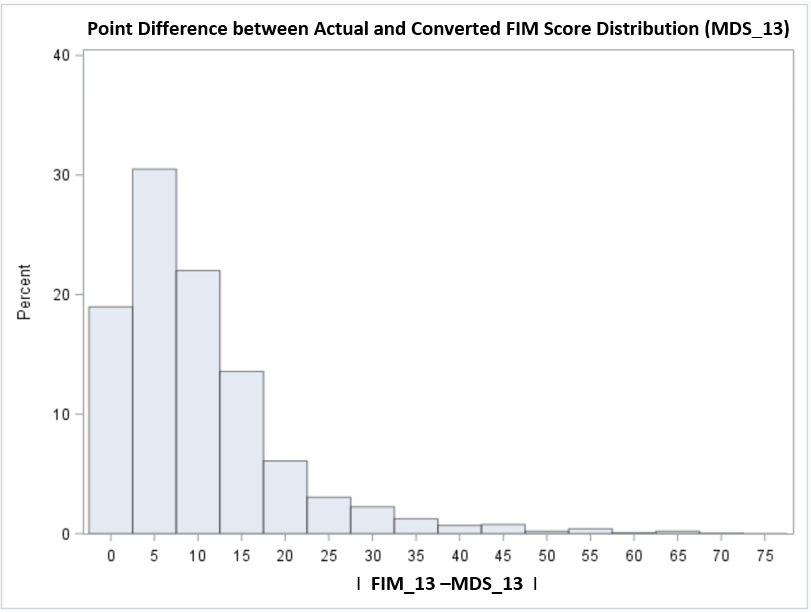

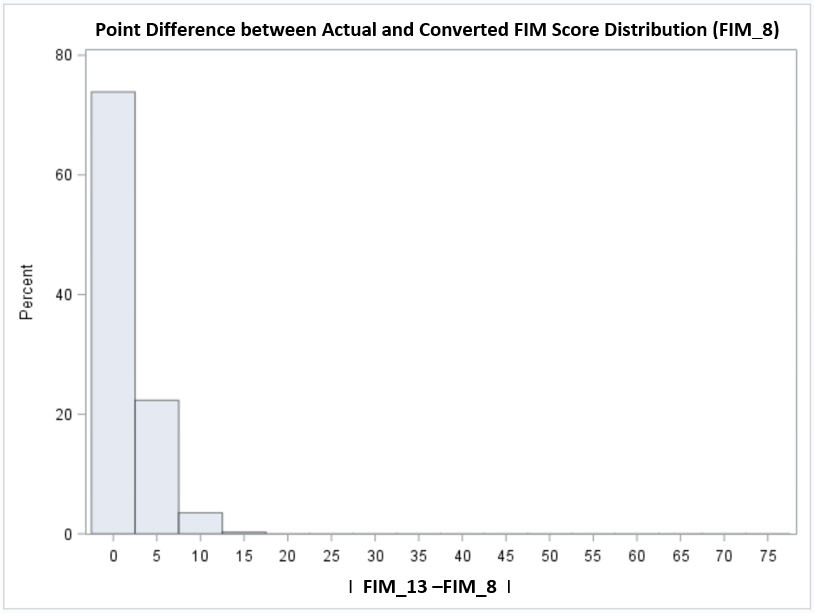


(c) (d)


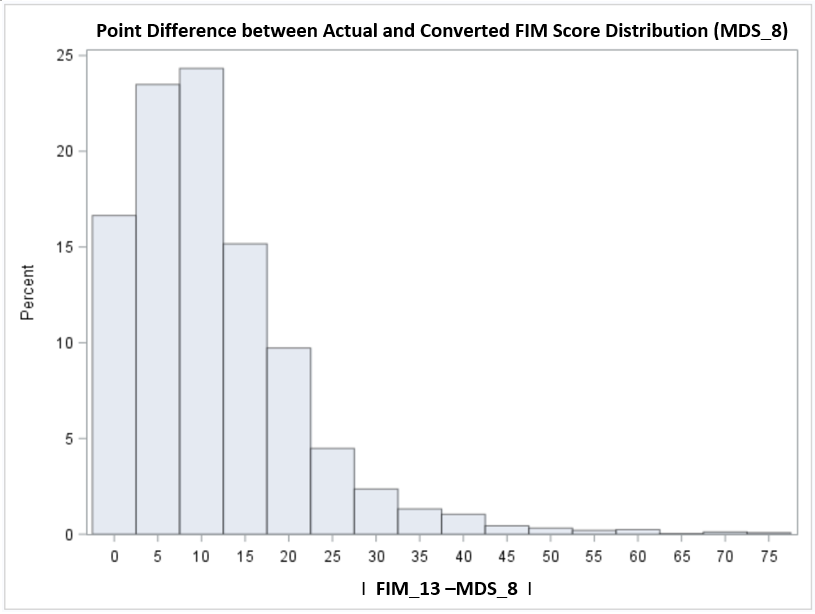

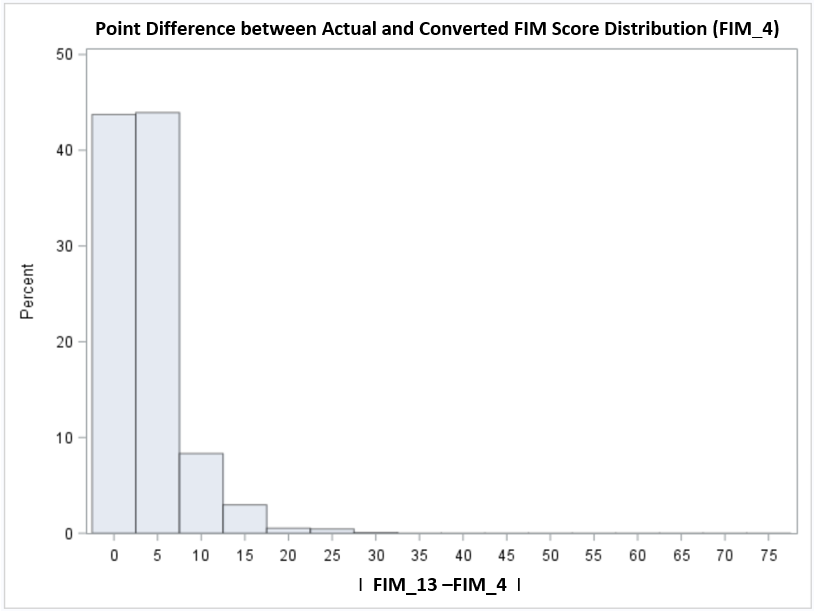


(e)


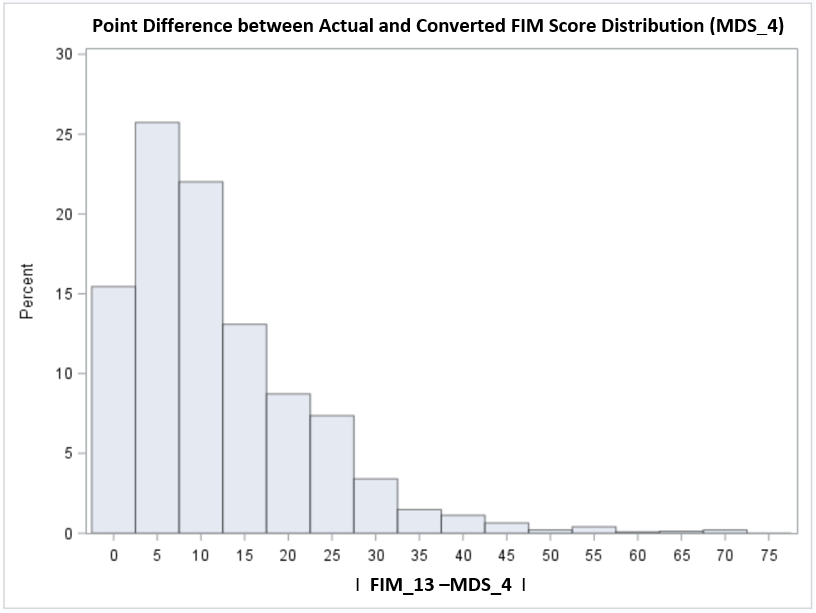


Figure 6. Short Form Development Procedure (n=371)

FIM-MDS Item Bank

26

Local

Independency

Eliminate items with > .2 residual correlation

Fit to Rasch Model

Cover a Full Spectrum of Difficulty Levels

Select items at least 2 standard errors apart from full range of estimates

4 items

25

IRT analysis/item calibration

FIM and MDS Short Forms

Among the above items, select items with discrimination parameter closest to 1

8 items
